# Supplementary material
Source: PubMed Central journal article supplement (PMC10057632)
Supplement: NIHMS1877063-supplement-Supplemental_Material.pdf [file NIHMS1877063-supplement-Supplemental_Material.pdf]

## Supplementary Materials

### Measure Items

**Negative affect.** Mothers read each of the following words and responded on a scale from 1 (not at all) to 7 (very) to indicate how strongly they felt that affect in the present moment:

- Tense
- Anxious
- Guilty
- Irritable
- Easily distracted

**Depression symptoms.** Mothers were prompted to “think about today” and on a scale from 0 (very slightly or not at all) to 4 (extremely) rate the extent to which they had felt:

- Little interest or pleasure in doing things
- Down, depressed, or hopeless

**Anxiety symptoms.** Mothers were prompted to “think about today” and on a scale from 0 (very slightly or not at all) to 4 (extremely) rate the extent to which they had felt:

- Feeling nervous, anxious, or on edge
- Not being able to stop or control worrying

### Pearson Correlations Between Predictor Variables Using Pairwise Observations

|                   | crying 10 minutes | crying 1 hour | crying 8 hours |
|-------------------|-------------------|---------------|----------------|
| crying 10 minutes |                   |               |                |
| crying 1 hour     | 0.58              |               |                |
| crying 8 hours    | 0.32              | 0.52          |                |

\* all significant at  $p < .001$

## Full Regression Tables

### Negative Affect

1. summary(lmm.1 <- lmer(NA. ~ norLenaCry.10.wpc + norLenaCry.10.mean + Weeks + First.time.mom + Education + (1 | P), data = data))

|                                             | Estimate | SE   | df     | t value | p value |     |
|---------------------------------------------|----------|------|--------|---------|---------|-----|
| (Intercept)                                 | 3.55     | 0.70 | 36.75  | 5.095   | 0.000   | *** |
| 10 minutes crying (within-person variation) | 0.36     | 0.09 | 470.80 | 3.851   | 0.000   | *** |
| 10 minutes crying (person mean-centered)    | -0.18    | 1.21 | 36.59  | -0.147  | 0.884   |     |
| Weeks                                       | -0.01    | 0.01 | 36.94  | -1.135  | 0.264   |     |
| First time mom                              | -0.09    | 0.21 | 36.81  | -0.443  | 0.661   |     |
| Graduate School                             | -0.16    | 0.27 | 36.44  | -0.568  | 0.574   |     |
| High School                                 | -0.31    | 0.36 | 36.70  | -0.871  | 0.389   |     |
| Some College                                | -0.17    | 0.29 | 36.79  | -0.597  | 0.554   |     |

2. summary(lmm.1 <- lmer(NA. ~ norLenaCry.1.wpc + norLenaCry.1.mean + Weeks + First.time.mom + Education + (1 | P), data = data))

|                                         | Estimate | SE   | df     | t value | p value |     |
|-----------------------------------------|----------|------|--------|---------|---------|-----|
| (Intercept)                             | 3.27     | 0.43 | 36.99  | 7.694   | 0.000   | *** |
| 1 hour crying (within-person variation) | 0.57     | 0.11 | 454.73 | 5.210   | 0.000   | *** |
| 1 hour crying (person mean-centered)    | 1.46     | 1.16 | 36.61  | 1.259   | 0.216   |     |
| Weeks                                   | -0.01    | 0.01 | 36.79  | -1.238  | 0.224   |     |
| First time mom                          | -0.03    | 0.21 | 36.86  | -0.154  | 0.879   |     |
| Graduate School                         | -0.21    | 0.26 | 36.40  | -0.798  | 0.430   |     |
| High School                             | -0.27    | 0.34 | 36.96  | -0.791  | 0.434   |     |
| Some College                            | -0.19    | 0.27 | 36.74  | -0.705  | 0.485   |     |

3. summary(lmm.1 <- lmer(NA. ~ norLenaCry.8.wpc + norLenaCry.8.mean + Weeks + First.time.mom + Education + (1 | P), data = data))

|                                          | Estimate | SE   | df     | t value | p value |     |
|------------------------------------------|----------|------|--------|---------|---------|-----|
| (Intercept)                              | 3.48     | 0.68 | 36.16  | 5.081   | 0.000   | *** |
| 8 hours crying (within-person variation) | 0.06     | 0.02 | 410.40 | 2.744   | 0.006   | **  |
| 8 hours crying (person mean-centered)    | 0.03     | 0.17 | 35.99  | 0.179   | 0.859   |     |
| Weeks                                    | -0.01    | 0.01 | 37.92  | -0.981  | 0.333   |     |

|                 |       |      |       |        |       |
|-----------------|-------|------|-------|--------|-------|
| First time mom  | -0.13 | 0.20 | 36.39 | -0.631 | 0.532 |
| Graduate School | -0.12 | 0.27 | 36.26 | -0.433 | 0.667 |
| High School     | -0.34 | 0.35 | 36.60 | -0.966 | 0.340 |
| Some College    | -0.18 | 0.27 | 36.63 | -0.649 | 0.520 |

### Depression Symptoms

1. `summary(lmm.1 <- lmer(Depression ~ norLenaCry.10.wpc + norLenaCry.10.mean + Weeks + First.time.mom + Education + (1 | P), data = data))`

|                                             | Estimate | SE   | df    | t value | p value |    |
|---------------------------------------------|----------|------|-------|---------|---------|----|
| (Intercept)                                 | 1.30     | 0.41 | 39.90 | 3.183   | 0.003   | ** |
| 10 minutes crying (within-person variation) | 0.21     | 0.21 | 96.94 | 0.992   | 0.323   |    |
| 10 minutes crying (person mean-centered)    | 0.03     | 0.69 | 37.11 | 0.045   | 0.964   |    |
| Weeks                                       | -0.01    | 0.01 | 31.75 | -0.942  | 0.353   |    |
| First time mom                              | 0.04     | 0.12 | 31.47 | 0.342   | 0.734   |    |
| Graduate School                             | 0.03     | 0.15 | 30.41 | 0.173   | 0.863   |    |
| High School                                 | 0.23     | 0.21 | 35.67 | 1.069   | 0.292   |    |
| Some College                                | 0.26     | 0.15 | 29.61 | 1.725   | 0.095   | .  |

2. `summary(lmm.1 <- lmer(Depression ~ norLenaCry.1.wpc + norLenaCry.1.mean + Weeks + First.time.mom + Education + (1 | P), data = data))`

|                                         | Estimate | SE   | df    | t value | p value |     |
|-----------------------------------------|----------|------|-------|---------|---------|-----|
| (Intercept)                             | 1.07     | 0.24 | 36.12 | 4.430   | 0.000   | *** |
| 1 hour crying (within-person variation) | 0.26     | 0.22 | 94.43 | 1.164   | 0.248   |     |
| 1 hour crying (person mean-centered)    | 0.58     | 0.65 | 35.93 | 0.879   | 0.385   |     |
| Weeks                                   | -0.01    | 0.01 | 32.62 | -0.982  | 0.333   |     |
| First time mom                          | 0.08     | 0.12 | 32.29 | 0.697   | 0.491   |     |
| Graduate School                         | 0.05     | 0.14 | 31.09 | 0.377   | 0.709   |     |
| High School                             | 0.29     | 0.21 | 40.79 | 1.382   | 0.174   |     |
| Some College                            | 0.28     | 0.15 | 30.61 | 1.870   | 0.071   | .   |

3. `summary(lmm.1 <- lmer(Depression ~ norLenaCry.8.wpc + norLenaCry.8.mean + Weeks + First.time.mom + Education + (1 | P), data = data))`

|  | Estimate | SE | df | t value | p value |
|--|----------|----|----|---------|---------|
|--|----------|----|----|---------|---------|

|                                          |       |      |       |        |       |   |
|------------------------------------------|-------|------|-------|--------|-------|---|
| (Intercept)                              | 1.05  | 0.43 | 27.98 | 2.473  | 0.020 | * |
| 8 hours crying (within-person variation) | 0.16  | 0.07 | 35.39 | 2.314  | 0.027 | * |
| 8 hours crying (person mean-centered)    | 0.04  | 0.11 | 27.73 | 0.379  | 0.708 |   |
| Weeks                                    | -0.01 | 0.01 | 25.61 | -1.020 | 0.317 |   |
| First time mom                           | -0.08 | 0.14 | 26.21 | -0.545 | 0.591 |   |
| Graduate School                          | 0.01  | 0.17 | 25.78 | 0.045  | 0.965 |   |
| High School                              | 0.04  | 0.27 | 27.64 | 0.149  | 0.883 |   |
| Some College                             | 0.45  | 0.17 | 25.94 | 2.599  | 0.015 | * |

4. summary(lmm.1 <- lmer(Little.interest.or.pleasure.in.doing.things ~ norLenaCry.8.wpc + norLenaCry.8.mean + Weeks + First.time.mom + Education + (1 | P), data = data))

|                                          | Estimate | SE    | df    | t value | p value |     |
|------------------------------------------|----------|-------|-------|---------|---------|-----|
| (Intercept)                              | 1.07     | 0.25  | 25.38 | 4.366   | 0.000   | *** |
| 8 hours crying (within-person variation) | 0.12     | 0.05  | 46.02 | 2.389   | 0.021   | *   |
| 8 hours crying (person mean-centered)    | -0.01    | 0.06  | 24.20 | -0.212  | 0.834   |     |
| Weeks                                    | 0.00     | 0.00  | 20.10 | -0.781  | 0.444   |     |
| First time mom                           | -0.09    | 0.08  | 21.22 | -1.097  | 0.285   |     |
| Graduate School                          | 0.04     | 0.097 | 21.19 | 0.384   | 0.705   |     |
| High School                              | 0.15     | 0.155 | 21.45 | 0.995   | 0.331   |     |
| Some College                             | 0.28     | 0.10  | 20.45 | 2.839   | 0.010   | *   |

5. summary(lmm.1 <- lmer(Down.depressed.or.hopeless ~ norLenaCry.8.wpc + norLenaCry.8.mean + Weeks + First.time.mom + Education + (1 | P), data = data))

|                                          | Estimate | SE   | df    | t value | p value |    |
|------------------------------------------|----------|------|-------|---------|---------|----|
| (Intercept)                              | 0.96     | 0.32 | 28.01 | 3.005   | 0.006   | ** |
| 8 hours crying (within-person variation) | 0.03     | 0.04 | 30.21 | 0.592   | 0.558   |    |
| 8 hours crying (person mean-centered)    | 0.07     | 0.08 | 27.90 | 0.858   | 0.398   |    |
| Weeks                                    | -0.01    | 0.01 | 26.52 | -0.980  | 0.336   |    |
| First time mom                           | 0.00     | 0.11 | 26.91 | -0.003  | 0.998   |    |
| Graduate School                          | -0.02    | 0.13 | 26.55 | -0.122  | 0.904   |    |
| High School                              | -0.08    | 0.21 | 27.99 | -0.410  | 0.685   |    |
| Some College                             | 0.23     | 0.13 | 26.74 | 1.758   | 0.090   | .  |

## Anxiety Symptoms

1. `summary(lmm.1 <- lmer(Anxiety ~ norLenaCry.10.wpc + norLenaCry.10.mean + Weeks + First.time.mom + Education + (1 | P), data = data))`

|                                             | Estimate | SE   | df    | t value | p value |   |
|---------------------------------------------|----------|------|-------|---------|---------|---|
| (Intercept)                                 | 1.41     | 0.55 | 40.38 | 2.580   | 0.014   | * |
| 10 minutes crying (within-person variation) | -0.03    | 0.20 | 85.29 | -0.150  | 0.881   |   |
| 10 minutes crying (person mean-centered)    | -0.05    | 0.94 | 39.11 | -0.057  | 0.955   |   |
| Weeks                                       | 0.00     | 0.01 | 35.98 | 0.298   | 0.767   |   |
| First time mom                              | 0.02     | 0.16 | 36.18 | 0.131   | 0.896   |   |
| Graduate School                             | -0.16    | 0.21 | 35.58 | -0.788  | 0.436   |   |
| High School                                 | 0.03     | 0.29 | 38.06 | 0.105   | 0.917   |   |
| Some College                                | 0.15     | 0.21 | 35.12 | 0.723   | 0.475   |   |

2. `summary(lmm.1 <- lmer(Anxiety ~ norLenaCry.1.wpc + norLenaCry.1.mean + Weeks + First.time.mom + Education + (1 | P), data = data))`

|                                         | Estimate | SE   | df    | t value | p value |    |
|-----------------------------------------|----------|------|-------|---------|---------|----|
| (Intercept)                             | 1.07     | 0.34 | 37.46 | 3.131   | 0.003   | ** |
| 1 hour crying (within-person variation) | 0.06     | 0.23 | 80.40 | 0.255   | 0.800   |    |
| 1 hour crying (person mean-centered)    | 1.34     | 0.92 | 37.92 | 1.456   | 0.154   |    |
| Weeks                                   | 0.00     | 0.01 | 35.86 | 0.294   | 0.770   |    |
| First time mom                          | 0.06     | 0.17 | 35.47 | 0.362   | 0.719   |    |
| Graduate School                         | -0.17    | 0.21 | 35.22 | -0.844  | 0.405   |    |
| High School                             | 0.12     | 0.29 | 39.36 | 0.397   | 0.694   |    |
| Some College                            | 0.17     | 0.21 | 34.71 | 0.797   | 0.431   |    |

3. `summary(lmm.1 <- lmer(Anxiety ~ norLenaCry.8.wpc + norLenaCry.8.mean + Weeks + First.time.mom + Education + (1 | P), data = data))`

|                                          | Estimate | SE   | df    | t value | p value |   |
|------------------------------------------|----------|------|-------|---------|---------|---|
| (Intercept)                              | 1.07     | 0.56 | 29.03 | 1.919   | 0.065   | . |
| 8 hours crying (within-person variation) | 0.09     | 0.08 | 31.53 | 1.208   | 0.236   |   |
| 8 hours crying (person mean-centered)    | 0.08     | 0.14 | 28.92 | 0.552   | 0.585   |   |
| Weeks                                    | 0.00     | 0.01 | 27.51 | 0.073   | 0.942   |   |
| First time mom                           | 0.02     | 0.18 | 27.90 | 0.116   | 0.908   |   |

|                 |       |      |       |        |       |
|-----------------|-------|------|-------|--------|-------|
| Graduate School | -0.09 | 0.23 | 27.55 | -0.395 | 0.696 |
| High School     | -0.05 | 0.36 | 29.00 | -0.154 | 0.879 |
| Some College    | 0.36  | 0.23 | 27.73 | 1.588  | 0.124 |
